# Supplementary material
Source: publisher figshare collection journal article supplement (https://acs.figshare.com/ndownloader/files/4030030)
Supplement: Supplementary file 1 [file 4030030]

## Sheet: primers probes
Sequences of the primers used for RT-qPCR
contig		forward primer	reverse primer
target genes	Best BLAST hit
Locus_651_Transcript_5/8_Confidence_0.550	gi|255546993|ref|XP_002514554.1|zinc/iron transporter, putative [Ricinus communis]	TGGAGATGGGGATAGTGGTG	CCCAGAGAGAGTCCGATCAC
Locus_2227_Transcript_6/6_Confidence_0.533	gi|255563762|ref|XP_002522882.1|Oligopeptide transporter, putative [Ricinus communis]	ATCGTTGCAGAGAACCTTGC	TTTTCGCACTCTCCATAGGC
Locus_11195_Transcript_2/3_Confidence_0.750	gi|255549838|ref|XP_002515970.1|ATP-binding cassette transporter, putative [Ricinus communis]	TCATTCTGGCTGATGTACGC	TCAATGAGTTCGTCCCACAG
Locus_17641_Transcript_1/1_Confidence_1.000	gi|297745980|emb|CBI16036.3|unnamed protein product, Ctr copper transporter family [Vitis vinifera]	TGAAGAGGATCTCCGAGTGG	GATGGACCCACATGACCTTC
Locus_26944_Transcript_1/1_Confidence_1.000	gi|225429791|ref|XP_002280681.1|PREDICTED: hypothetical protein [Vitis vinifera]	TCCGCAAGTACACACCAGAG	CCCTCGACTCCAGAACCTTAC
Locus_34187_Transcript_1/1_Confidence_1.000	gi|242096138|ref|XP_002438559.1|hypothetical protein SORBIDRAFT_10g021930 [Sorghum bicolor]	TATCGACTGGGTTGGACAGC	GGAGGCACTTGACAATTTGG
Locus_38993_Transcript_1/1_Confidence_1.000	gi|307136290|gb|ADN34117.1|phospholipid-transporting ATPase [Cucumis melo subsp. melo]	TTGAGGAGGAAACAACGAAAC	GCAAACCAGCATCACCATAC
Locus_41245_Transcript_1/1_Confidence_1.000	gi|147783115|emb|CAN64245.1|hypothetical protein heavy metal p-type ATPase VITISV_035322 [Vitis vinifera]	CTCTTGGCCTAGCAACACC	CACCAACACCAGTACCAACC
reference genes
Locus_7539_Transcript_1/1_Confidence_1.000	gi|226505442|ref|NP_001147404.1|RING-H2 finger protein ATL3I [Zea mays]	CAAGGCAATTCCCAACTAGG	AACCACAACTCGGGCTCTC
Locus_20334_Transcript_1/1_Confidence_1.000	gi|15220572|ref|NP_176363.1|DNA-directed RNA polymerases II subunit L [Arabidopsis thaliana]	GCAGGCGGATTACTCTGAAG	GAACAAGGCCCAGAGCATC
Locus_22170_Transcript_1/1_Confidence_1.000	gi|359474639|ref|XP_002265359.2|PREDICTED: cyclin-dependent kinase F-4-like [Vitis vinifera]	AAAGCTGGTGATTGGAATGG	TCGAGAGATTTCTGGGCAAC
Probes used for nCounter analyses
contig ID	Best BLAST hit	Accession	Function	Targeted Region	Target Sequence	Tm_CP	Tm_RP	Flags	Gene	PN(CP;RP)	NSID
Locus_10066_Transcript_1/2	gi|115458664|ref|NP_001052932.1|Os04g0449500 [Oryza sativa Japonica Group] >gi|38344840|emb|CAE01571.2| OSJNBa0064H22.21 [Oryza sativa Japonica Group] >gi|113564503|dbj|BAF14846.1| Os04g0449500 [Oryza sativa Japonica Group] >gi|116310074|emb|CAH67095.1| H0818E04.12 [Oryza sativa Indica Group] >gi|125548502|gb|EAY94324.1| hypothetical protein OsI_16092 [Oryza sativa Indica Group] >gi|125590553|gb|…	Cosio_1_213.1	target	230-330	ACCGAGAACATCAAATCTTGGTCATTTGCGCAGCAGTGGAGATGCTTGCTAAACTTTGTTTTGAACGATCTCGAGCGACGTATGCGATCTCACCGAGCGG	83	79		Locus_10066	348034;248034	Cosio_1_213.1:230
Locus_101_Transcript_9/10	gi|357471247|ref|XP_003605908.1|50S ribosomal protein L2 [Medicago truncatula] >gi|355506963|gb|AES88105.1| 50S ribosomal protein L2 [Medicago truncatula]	Cosio_1_194.1	target	1380-1480	TGGGGATGGTGAGAAGAGATATATTTTACATCCCAGAGGGGCTATAATTGGAGATACCATTGTTTCGGGTACAGAAGTTCCTATAGCAATGGGAAATGCC	82	81		Locus_101	348026;248026	Cosio_1_194.1:1380
Locus_1068_Transcript_2/2	gi|339275441|dbj|BAK51923.1|putative high affinity nitrate transporter [Egeria densa] >gi|339275443|dbj|BAK51924.1| putative high affinity nitrate transporter [Egeria densa]	Cosio_1_145.1	target	829-929	GGAGCTCACAGTGGACAACATCATCGCGGAGTACTTCTACGATCGGTTCAATCTGAAACTTCGCACGGCGGGGATGGTAGCTGCGAGCTTCGGGCTGGCG	84	86		Locus_1068	348180;248180	Cosio_1_145.1:829
Locus_10816_Transcript_1/1	gi|319996466|dbj|BAJ61942.1|ubiquitin [Nymphaea hybrid cultivar]	Cosio_1_127.1	target	34-134	ACAGCTAGAGGATGGCAGGACTCTTGCTGACTACAACATACAGAAGGAATCTACCCTTCATCTTGTGCTACGCCTGCGTGGTGGTATGCAGATTTTTGTC	85	78		Locus_10816	348116;248116	Cosio_1_127.1:34
Locus_11195_Transcript_1/3	gi|242096138|ref|XP_002438559.1|hypothetical protein SORBIDRAFT_10g021930 [Sorghum bicolor] >gi|241916782|gb|EER89926.1| hypothetical protein SORBIDRAFT_10g021930 [Sorghum bicolor]	Cosio_1_184.1	target	157-257	TGGGGAGAGAGATGCCCACCTTGTCGATGCGGTTCCGGAGCTTGCGGAGGAAGCGCTCGTTGTCCTCCTCGGCGACGCGGAAGACCCTGTCGATGAACTC	85	86		Locus_11195	348185;248185	Cosio_1_184.1:157
Locus_1123_Transcript_1/2	no hit	Cosio_1_221.1	target	150-250	TCCAAACAAGTACCAAAACTACTAAACTATTACAACTCAGTCCCTGCGAAAGGACCTACATGCAATTCTAAAGAACTAACAGGGCGTAAGTGCAAATGTA	82	84		Locus_1123	348071;248071	Cosio_1_221.1:150
Locus_11235_Transcript_2/2	gi|225428436|ref|XP_002283953.1|PREDICTED: isoflavone reductase homolog [Vitis vinifera] >gi|297744403|emb|CBI37665.3| unnamed protein product [Vitis vinifera]	Cosio_1_095.1	target	20-120	AGGAGGCTGGAAATATCAAGAGGTTCTTCCCATCGGAATTCGGGAATGACGTGGACCATAGCCATGCCGTCGAACCGGCTAAATCTCTGTTCGCGTTAAA	84	82		Locus_11235	348001;248001	Cosio_1_095.1:20
Locus_1139_Transcript_1/10	gi|224091989|ref|XP_002309427.1|predicted protein [Populus trichocarpa] >gi|222855403|gb|EEE92950.1| predicted protein [Populus trichocarpa]	Cosio_1_131.1	target	157-257	GAAGCAAGGTCTTTTCTCCCGCAAACAACAAACAAGAAGTCGGATTGAAGACAAGAACACACTCGTCCTAATCTAAGAACTTCCTGTAAAGTCGGACAAT	81	81		Locus_1139	348179;248179	Cosio_1_131.1:157
Locus_12459_Transcript_1/1	gi|357168011|ref|XP_003581439.1|PREDICTED: LOW QUALITY PROTEIN: cytokinin dehydrogenase 8-like [Brachypodium distachyon]	Cosio_1_240.1	target	140-240	TCACCCATGGTTGACCATGTTCCTCCCAAGGAGCCAGATTGGCAAAATTAAGGATCTCTTGCTCGAAACTGTTGCAGCCAAGCCTATCAATGGTCCTCTT	83	83		Locus_12459	348043;248043	Cosio_1_240.1:140
Locus_12891_Transcript_1/1	no hit	Cosio_1_163.1	target	7-107	CCGTGTCATTGGCGCCATCACTTGGGGAGTCCGAATGGATGTTGGAGGGGAGGTAAATCGAAGCAGTTTGCGCTGTAGTTCCAGGGTTGTCCGATTTAAA	85	76		Locus_12891	348097;248097	Cosio_1_163.1:7
Locus_13136_Transcript_4/4	no hit	Cosio_1_150.1	target	92-192	TGCAAGCCCTCGTCTATGTCATCCTCTCCAACTCCTCCAACCTCTTCTCCTCGTCCTCCTCCTTGGCAAGGTCCTTCAGCTTCAGGACCATGCGCTCCGC	84	85		Locus_13136	348182;248182	Cosio_1_150.1:92
Locus_13923_Transcript_2/2	no hit	Cosio_1_218.1	target	48-148	ATCTGTGGGATTAAACCACCTGCAAAATCGAAATTTTATTGGTCGAATTCGCGAGATCGTACACACGTCTCGAAGAACAAACAGTACGGCACCTCCAAGA	73	85		Locus_13923	348131;248131	Cosio_1_218.1:48
Locus_14922_Transcript_1/2	no hit	Cosio_1_204.1	target	7-107	ATAAAATCAAATGGTGTTGTCGACTGAAAAAAATACAGAAAATGTAGTCCAGGCAGAAAAAAATTCATAATCAAAGAAATGACAACAGCAAAATAAAATA	75	76		Locus_14922	348085;248085	Cosio_1_204.1:7
Locus_15282_Transcript_1/1	gi|449527165|ref|XP_004170583.1|PREDICTED: succinate dehydrogenase [ubiquinone] flavoprotein subunit 1, mitochondrial-like, partial [Cucumis sativus]	Cosio_1_007.1	target	70-170	TGCCATCGGGCTCGCCGAGAATGGCTTCAATACCGCGTGCATCTCCAAACTCTTCCCCACGCGCTCGCATACTGTTGCAGCTCAGGGTGGTATGAACGCG	85	85		Locus_15282	348044;248044	Cosio_1_007.1:70
Locus_15608_Transcript_1/1	no hit	Cosio_1_069.1	target	361-461	CTGCGTCCTCCTCCCAGAAGTAGTCCTCTGCTGGGGTGCCCCTGATGCCGGTGACCTGCTGCACCATCTCCCGGAATCGGACGGCGTCGGCGAAGATGAA	88	87		Locus_15608	348100;248100	Cosio_1_069.1:361
Locus_159_Transcript_1/4	gi|219887219|gb|ACL53984.1|unknown [Zea mays]	Cosio_1_092.1	target	122-222	GCAATCGACGGCGAGTATCTGTCGGTATCCTCCGCCGGAACTCTGTCGACCTTGTTCGATGTCGGAGGCGTGCTCGGCGGGGTCCTGGCGGGCCACATCT	86	85		Locus_159	348174;248174	Cosio_1_092.1:122
Locus_159_Transcript_2/4	gi|219887219|gb|ACL53984.1|unknown [Zea mays]	Cosio_1_071.1	target	779-879	TGTATAGGGAGTTGGGATCGTCAAGATAAATTGCTGCGTCTGTTCTCGTGTGGTTCGTAGCAGTGGAAAGAAAGCCCATTTGTACAGTGTGATTTGTGTT	78	76		Locus_159	348155;248155	Cosio_1_071.1:779
Locus_16_Transcript_1/4	gi|470123361|ref|XP_004297695.1|PREDICTED: katanin p80 WD40 repeat-containing subunit B1 homolog [Fragaria vesca subsp. vesca]	Cosio_1_130.1	target	85-185	TTCAGGAGGGGTAAGAGAGTAGTACAGATATCCAATGTAATAATGTCGCTTTTCTCAACAAACACGCTTACAATGTCAGCAGACACAGCATGATCAGACA	81	82		Locus_16	348064;248064	Cosio_1_130.1:85
Locus_16568_Transcript_1/1	gi|357112308|ref|XP_003557951.1|PREDICTED: sucrose synthase 2-like [Brachypodium distachyon]	Cosio_1_227.1	target	10-110	TCTTTGCTTCCTGCAATCTCCTGGTATGTGCTGGTGATTATAAAATCTGCGGTGTTCATTGCAATCAGATCAGCTGTAAATTGGCAAGAAAAATGATACT	77	77		Locus_16568	348073;248073	Cosio_1_227.1:10
Locus_166_Transcript_3/5	no hit	Cosio_1_200.1	target	365-465	CTCTATCAACCAATAATTTGGGACTAGGAACATGGTTAAAACGAAACTGTTTGAAGTCCAGGCACAACGGGGTACTCTTTCTACCACTATGTTAATACAA	78	80		Locus_166	348069;248069	Cosio_1_200.1:365
Locus_17067_Transcript_3/3	gi|226713777|sp|Q1EPG6.2|CSPL2_MUSACRecName: Full=CASP-like protein MA4_106O17.52	Cosio_1_164.1	target	470-570	GGCAGAAGTCCGTCTTGAAGTGGTTTGGCTTACGTTCCTCAACGTCGACCTTGCGCTCGCCGCCGTTGGATGCCATAGGATCAGTCGTACGATTACGTAG	81	82		Locus_17067	348066;248066	Cosio_1_164.1:470
Locus_17311_Transcript_1/1	no hit	Cosio_1_205.1	target	565-665	GCCCAACAACCATTTCGTATGGCCAGACTATGTTTTGCTACGGCCAGGCCCTGCGAGTCGAGCTATGGAATAAGGACTACGGTCCAGGGTTTGATTGCAA	84	84		Locus_17311	348031;248031	Cosio_1_205.1:565
Locus_17641_Transcript_1/1	gi|460401613|ref|XP_004246312.1|PREDICTED: copper transporter 6-like [Solanum lycopersicum]	Cosio_1_135.1	target	790-890	TTAAAAAACGACCGAAGCTGTTCAAGATCCAAATCCCATCGTAACCTCTCTATTGGACAGACTGTAAACAGGAACATAAACACCTGGAGCACATGCAGAG	79	86		Locus_17641	348010;248010	Cosio_1_135.1:790
Locus_17890_Transcript_1/1	gi|357114073|ref|XP_003558825.1|PREDICTED: uncharacterized protein LOC100831773 [Brachypodium distachyon]	Cosio_1_178.1	target	115-215	AGACTCGAGGCTCTCAAAGTACGAGAATGAGCATTTTTAAAATGCCTGTCCCTTGATCATGACTGTAACATTTACCATGGCAAAGACAAGTGACCGTCAT	80	80		Locus_17890	348068;248068	Cosio_1_178.1:115
Locus_17984_Transcript_1/1	gi|226501428|ref|NP_001148069.1|CBS domain containing protein [Zea mays] >gi|195615614|gb|ACG29637.1| CBS domain containing protein [Zea mays] >gi|223947611|gb|ACN27889.1| unknown [Zea mays] >gi|414868431|tpg|DAA46988.1| TPA: CBS domain containing protein [Zea mays]	Cosio_1_115.1	target	60-160	GGGGCTGGAAGCGACCGAGATAATATTCAGCTACTTTATGAAGATGATGAAGGTGACAGAATCATGTTGCTCACTGATAATGATCTTGCTGGAGCTGTAA	83	82		Locus_17984	348007;248007	Cosio_1_115.1:60
Locus_18039_Transcript_1/1	no hit	Cosio_1_010.1	target	5-105	CAATTGATGGAGCCCGACTAGGACCCTTATTAGAGAAGAGGATATCACAAGGAGAATCTGAGATGGTGTCTGATCATCTCTCGCAAACATTTCGCATGCT	84	81		Locus_18039	347983;247983	Cosio_1_010.1:5
Locus_18099_Transcript_2/2	gi|359473120|ref|XP_002282202.2|PREDICTED: E3 ubiquitin-protein ligase RGLG2-like [Vitis vinifera] >gi|296081383|emb|CBI16816.3| unnamed protein product [Vitis vinifera]	Cosio_1_094.1	target	123-223	CCTGCTTCTCCATCTCCTGTCAAAAGAATTTCTGAAAGCACCAGCTTTCAGGGAAGTGCTCCACCTCTGCCTACTTATGAATCAGCACCAAGCACTCGTC	78	85		Locus_18099	348169;248169	Cosio_1_094.1:123
Locus_18100_Transcript_1/2	gi|238010194|gb|ACR36132.1|unknown [Zea mays] >gi|414877811|tpg|DAA54942.1| TPA: copine family protein [Zea mays]	Cosio_1_096.1	target	290-390	GGGACAAGTCAAGCAAGCCTCAATCTGAAACACGAATGCTAGATATGAACAAGCTGTCGCGATGACTAGCACTATACATCCACATTAGAACTGCTTCAAG	84	82		Locus_18100	348002;248002	Cosio_1_096.1:290
Locus_1990_Transcript_1/2	no hit	Cosio_1_074.1	target	0-100	CCCAGAAGAAAAGAAGCGAGAATGGATGCAGACCGATCGATTTTTTGAATCGTCTGGAACACAACAAAGGCAGCATCATCTGAAGTCGTTTCGTCACAGC	80	82		Locus_1990	347996;247996	Cosio_1_074.1:0
Locus_2055_Transcript_1/1	gi|347300846|gb|AEO72337.1|nitrate reductase 1 [Vitis vinifera]	Cosio_1_236.1	target	1440-1540	AGCTCACCGATGCAGTACGTCTCCAGCAAGGTCTTGGCCTTTTCGGAGTGGATAGCATCGAATTCCTCAGTGCAGTCAGTACCAGCGTTGATGAGGATGC	84	83		Locus_2055	348041;248041	Cosio_1_236.1:1440
Locus_20881_Transcript_2/4	gi|115434034|ref|NP_001041775.1|Os01g0106300 [Oryza sativa Japonica Group] >gi|10945248|dbj|BAB16909.1| putative isoflavone reductase [Oryza sativa Japonica Group] >gi|113531306|dbj|BAF03689.1| Os01g0106300 [Oryza sativa Japonica Group] >gi|125568707|gb|EAZ10222.1| hypothetical protein OsJ_00052 [Oryza sativa Japonica Group] >gi|215679059|dbj|BAG96489.1| unnamed protein product [Oryza sativa Japo…	Cosio_1_190.1	target	50-150	GGCAGCAAGATCCTTGTCATCGGAGGCACCGGGTACATCGGCAAGTTCATCGTCCAGGCGAGCGCCAAGTTGGGTCACCCTACCTTTGCTCTTGTAAGGG	85	86		Locus_20881	348024;248024	Cosio_1_190.1:50
Locus_21151_Transcript_1/2	gi|224076014|ref|XP_002304873.1|predicted protein [Populus trichocarpa] >gi|222842305|gb|EEE79852.1| predicted protein [Populus trichocarpa]	Cosio_1_034.1	target	554-654	CGGTGAGCTTCGTCCGCTCGACGAGCATATTCCTGCAGGGGCTATGGCTGATCGTGATGGGCGTGATGCTGTGGACGCCGGCGCTCATCGCCAAGGGCTG	84	86		Locus_21151	348172;248172	Cosio_1_034.1:554
Locus_2169_Transcript_1/1	gi|470147847|ref|XP_004309489.1|PREDICTED: glutamyl-tRNA(Gln) amidotransferase subunit A-like [Fragaria vesca subsp. vesca]	Cosio_1_192.1	target	255-355	GCAGGTTTAGTCCCATTTGCGATTGGCACTGAAACAGCAGGATCCATCACTTATCCAGCAGCACGCTGTGGGATTACAGGGTATCGTCCATCTTTTGGTA	83	79		Locus_2169	348025;248025	Cosio_1_192.1:255
Locus_21879_Transcript_1/2	no hit	Cosio_1_187.1	target	57-157	AGAACAACTCCTACGTGAGTCGAAACCAAGCAACATTCGCTCCTCTCCTCCTCCTCCTCCTGCAATGGCGGACAAGACGCTGATCGTGAAGGTGGATCTC	85	86		Locus_21879	348090;248090	Cosio_1_187.1:57
Locus_2192_Transcript_3/7	gi|357149934|ref|XP_003575282.1|PREDICTED: high-affinity nitrate transporter 3.1-like [Brachypodium distachyon]	Cosio_1_110.1	target	125-225	CGTTGAAGGGCACTTCGGCGACGGAGAACTGGCAGGTCTTGTCCTTGGCGAGGTTGTCGTTGGTCTTCCGCCACGTGCGGTCCGCTTGGCTCACCGGCGC	84	85		Locus_2192	348060;248060	Cosio_1_110.1:125
Locus_2204_Transcript_1/1	no hit	Cosio_1_142.1	target	65-165	CCGATAAGATGGTGGAGTTCTTCCGGTCATTTCTAGTGAAGATGATGAAGGGAGCAAAGCCTCAGAGCTAGTCACTGGATTCTCTGCCATCTCTACTTCT	78	86		Locus_2204	348012;248012	Cosio_1_142.1:65
Locus_22675_Transcript_1/1	gi|255582993|ref|XP_002532266.1|big map kinase/bmk, putative [Ricinus communis] >gi|223528054|gb|EEF30132.1| big map kinase/bmk, putative [Ricinus communis]	Cosio_1_040.1	target	370-470	GTCGGCATTGTCGTGGAGCCTCGACAGATATGGATGCGCAAGAGCCTCCTCCACTGTGATTCGTCTGGTGGGGTCGAAGGTGAGCATCCTCTCCAAGAGG	86	85		Locus_22675	347990;247990	Cosio_1_040.1:370
Locus_22813_Transcript_1/1	gi|462405337|gb|EMJ10801.1|hypothetical protein PRUPE_ppa011466mg [Prunus persica]	Cosio_1_036.1	target	0-100	AATCCAACCGCCGCCCGCCGCGTCCCGTCCTTCCTTGGGGACGTCTTCGAGCCGTTTTACCCCGCGCGGAGCCTTGCTCAGGTGTTGAACCTGATGGAGC	87	86		Locus_22813	348137;248137	Cosio_1_036.1:0
Locus_23946_Transcript_2/2	gi|357454935|ref|XP_003597748.1|Dynein light chain [Medicago truncatula] >gi|355486796|gb|AES67999.1| Dynein light chain [Medicago truncatula]	Cosio_1_047.1	target	200-300	GTGGGGTCGAACTTTGGATGCTTCTTCACGCATAGCAAAGGGAGCTTCATCTACTTCAACTTGGAGAAACTCAACTTCCTCCTCTTCAAAGGGATTGCAA	83	79		Locus_23946	347991;247991	Cosio_1_047.1:200
Locus_2422_Transcript_1/1	no hit	Cosio_1_026.1	target	0-100	CGCTACCTCCGCTGCTCCCCGTCCTCATATTCCAAGAGAAGAAACCATGTCCTGCTGCGGTGGAAACTGCGGGTGCGGCTCCAGCTGCAGCTGCGGCAAA	85	88		Locus_2422	348148;248148	Cosio_1_026.1:0
Locus_2442_Transcript_3/3	no hit	Cosio_1_100.1	target	219-319	TAATGACAAGCAGAAGAGTTGCATAGGAAAAAGAGACATTTGGTACATCTTTGGTGCACTTTAAATTCCTGCTCCAAAACAGTAGTCCCAGATCTGTAGA	81	79		Locus_2442	348175;248175	Cosio_1_100.1:219
Locus_2462_Transcript_2/4	gi|462400623|gb|EMJ06180.1|hypothetical protein PRUPE_ppa003207mg [Prunus persica]	Cosio_1_039.1	target	542-642	GCCGTGCCTTAGGGTCAAGTAATCAACTTTGGACACGGACCTCACAAACTGCCTGAAAAAGCATACAATCCAGGTAAGTACGGTTGAGTTGCTCCAGTAG	85	83		Locus_2462	348078;248078	Cosio_1_039.1:542
Locus_2519_Transcript_1/1	no hit	Cosio_1_162.1	target	6-106	ACCTCCTTCACTTTCCTCCACCGGTCACCGCCGAAGAGAAGAAGCTCGCAGCTCCGGTCCGGCGAACCGATCCCGCGGCGACGAGATGGTGCTACAGAGG	87	88		Locus_2519	348122;248122	Cosio_1_162.1:6
Locus_255_Transcript_1/1	no hit	Cosio_1_041.1	target	31-131	CGATGATAATACCCACATCCTCCAAATACCACAGATCTAGAACCATACTGGAACATGGCTAATCCACCATGAACCCTAAAACCAAGTTACTCCGATTTAT	82	80		Locus_255	348110;248110	Cosio_1_041.1:31
Locus_2574_Transcript_5/7	gi|357120718|ref|XP_003562072.1|PREDICTED: uncharacterized protein LOC100834682 [Brachypodium distachyon]	Cosio_1_203.1	target	260-360	ACGGCTGTTCAGTAATGTGAGTGCTGTGACCACGAGCGTTGAAAGAATTGTTGACAGAACCGAGAAGGGAGTGATGTAAATGAATACAAGATGCGTGTTG	82	83		Locus_2574	348030;248030	Cosio_1_203.1:260
Locus_26108_Transcript_3/3	no hit	Cosio_1_055.1	target	106-206	CCTTGAACCTGAGCTATAGGAACATGTACTACTTTACCTTATTTTCCTAAAAAATGTACTTTACCTTGTTGAATGGAAGACTTTGACTTGCAATCCAATA	74	73		Locus_26108	348105;248105	Cosio_1_055.1:106
Locus_26810_Transcript_1/2	no hit	Cosio_1_029.1	target	45-145	ACGATTTTCTTCCTTCTCCACAGACAGGTTGGAGTGTCTTACAAGGCTAGATGGAGCGAATAGGGATAATGTAGTGCAATAAAGTTGAGAGATAGATTAT	78	79		Locus_26810	348051;248051	Cosio_1_029.1:45
Locus_26944_Transcript_1/1	gi|359475997|ref|XP_002280681.2|PREDICTED: uncharacterized aarF domain-containing protein kinase At4g31390, chloroplastic-like [Vitis vinifera] >gi|296081769|emb|CBI20774.3| unnamed protein product [Vitis vinifera]	Cosio_1_033.1	target	110-210	GGGGGGCGGTGATTGAGCTGATTGGCCGAGGGGTGGAGATCGTGTGGAGTCTCGGTCTGTACTGGTCAGCGCTTGCATACGATTGCCTCGTTGGGAGGGA	86	85		Locus_26944	348045;248045	Cosio_1_033.1:110
Locus_27018_Transcript_1/1	no hit	Cosio_1_177.1	target	335-435	GAGAGGGTATCCTCGACGCGTTCTCGGATGCTGGGGATGCGCGAGAGCTTGGAGGCCGACATGGTTGGGTTCTTGGTGCTTCTTGCAGTGTGGTTGGCGG	86	85		Locus_27018	348021;248021	Cosio_1_177.1:335
Locus_27497_Transcript_1/2	no hit	Cosio_1_060.1	target	50-150	ACATATGACAAAAAATCAGAGTAGCTACCGCCTATAGTGGTAAATTGTTTTAAACATGTCCACAAATAGGAGGATGTGCAGTCCGAAGTGCACTGCATGG	76	85		Locus_27497	348087;248087	Cosio_1_060.1:50
Locus_27661_Transcript_1/1	no hit	Cosio_1_012.1	target	124-224	TTCTGGAAAAATAATAGGATCTATAATCTGTACGTCGATCTCGCAAGAATCTCAAACGAATCCATGCTCCTCCTACCTTAGCTGAGGGCACTCCTCTCCC	75	85		Locus_27661	348092;248092	Cosio_1_012.1:124
Locus_27730_Transcript_7/7	gi|255547776|ref|XP_002514945.1|ATP binding protein, putative [Ricinus communis] >gi|223545996|gb|EEF47499.1| ATP binding protein, putative [Ricinus communis]	Cosio_1_195.1	target	765-865	CGGGAAAGTCCAGCTTGATCGCAGCAATGGCCAACCATCTCAAGTTCGACGTGTACGATCTCGAGCTCACGGAGGTCTCGGACAATACGGCGCTGAGGTC	85	86		Locus_27730	348027;248027	Cosio_1_195.1:765
Locus_28556_Transcript_1/1	gi|33521216|gb|AAQ21370.1|beta-galactosidase [Sandersonia aurantiaca]	Cosio_1_216.1	target	454-554	CACGAAATACGGGTTGATGGAACAGATGAGCATCACGCGAGATACCACAGATTACATGTGGTATACAACCTATGTCAATATAGGTGCCCCGCAGCAAGCA	85	83		Locus_28556	348091;248091	Cosio_1_216.1:454
Locus_28730_Transcript_1/1	gi|168001517|ref|XP_001753461.1|predicted protein [Physcomitrella patens subsp. patens] >gi|162695340|gb|EDQ81684.1| predicted protein [Physcomitrella patens subsp. patens]	Cosio_1_015.1	target	290-390	GGCGATCGCATTGTGTCCGAGAAGGTTTCTTACTATTTCCGCTTCCCAGCCATTGATGATATCGTGCTCTTCAGGGTGCCCAAGTGTTTACAGGAAAGTG	78	79		Locus_28730	348050;248050	Cosio_1_015.1:290
Locus_2877_Transcript_3/6	gi|359497408|ref|XP_002268161.2|PREDICTED: 70 kDa peptidyl-prolyl isomerase-like, partial [Vitis vinifera] >gi|296090691|emb|CBI41091.3| unnamed protein product [Vitis vinifera]	Cosio_1_233.1	target	268-368	CAGGGATGTAAAGTTGGAATACAGATCCTTGAAAGAGAAGATCAAGGAGTACAACAAAAAGGAAGCCAAGTTTTACGGCAACATGTTTGCTAAAATGAAC	83	79		Locus_2877	348187;248187	Cosio_1_233.1:268
Locus_2877_Transcript_5/6	gi|359497408|ref|XP_002268161.2|PREDICTED: 70 kDa peptidyl-prolyl isomerase-like, partial [Vitis vinifera] >gi|296090691|emb|CBI41091.3| unnamed protein product [Vitis vinifera]	Cosio_1_229.1	target	445-545	ACGGAGATATGATGCCTTGCTGGTGGTGTTTCTGCATGAGAACGATGTAGTTGTGAAAGAGCCAGCCAGTGTCTAGAACAGCAGTGCATCCACAGTTTTA	83	82		Locus_2877	348153;248153	Cosio_1_229.1:445
Locus_2916_Transcript_1/1	gi|460368801|ref|XP_004230253.1|PREDICTED: serine/threonine-protein phosphatase PP1 isozyme 9-like [Solanum lycopersicum]	Cosio_1_097.1	target	97-197	GTAGGGATGACACTGAAAAAGGTCCCCAAGGGTGGAGGAGCATGACAGTATGAACAATCCAGGCATGAAGTCATCAGACATACCAGAGAAGTTATGTTGC	87	82		Locus_2916	348135;248135	Cosio_1_097.1:97
Locus_29533_Transcript_1/1	gi|357498827|ref|XP_003619702.1|Ubiquitin-like protein [Medicago truncatula] >gi|355494717|gb|AES75920.1| Ubiquitin-like protein [Medicago truncatula]	Cosio_1_086.1	target	43-143	CCGTATTCTCGTTCGTCTTTCAAGATGCAAATCTTTGTGAAGACCCTCACCGGAAAAACCATCACCCTTGAGGTTGAAAGTTCGGACACCATTGATAATG	73	80		Locus_29533	348106;248106	Cosio_1_086.1:43
Locus_30030_Transcript_2/3	gi|326497143|dbj|BAK02156.1|predicted protein [Hordeum vulgare subsp. vulgare]	Cosio_1_103.1	target	143-243	TCTCCGGCCATCCTGCGTCGTTTTGTCCTGCCATCTCGATGCTAGGAATTCGTTAACGTTCAGAGCATTGTTGCCGTAGGTGAGAGGGGAAGACCAGTAG	80	83		Locus_30030	348188;248188	Cosio_1_103.1:143
Locus_3136_Transcript_2/2	gi|351727929|ref|NP_001235130.1|heat shock 22 kDa protein, mitochondrial [Glycine max] >gi|3122228|sp|Q39818.1|HS22M_SOYBN RecName: Full=Heat shock 22 kDa protein, mitochondrial; Flags: Precursor >gi|710432|gb|AAB03096.1| Hsp23.9 [Glycine max]	Cosio_1_183.1	target	381-481	ACGGATTTGTGTTTTCTGCGAGGGGATGGATGTGGACTGTCCGATTTGAATATAACGGATCTGTGCGTCTGCTATGTAAACACAATAGCATTCCAAGGTT	79	79		Locus_3136	348184;248184	Cosio_1_183.1:381
Locus_31891_Transcript_1/1	gi|167989404|gb|ACA13522.1|dioxygenase [Fragaria x ananassa]	Cosio_1_059.1	target	125-225	AATCTGTTGAAGGGGAAGTTTTTTGCATCATTTGATGAAACAAAGAGGGCTCGTTTTGGTGTTCTTCCAAGGCATGCAACAGACGAACTCCAAATTAGGT	77	78		Locus_31891	348112;248112	Cosio_1_059.1:125
Locus_32133_Transcript_1/1	gi|226506352|ref|NP_001146345.1|uncharacterized protein LOC100279923 [Zea mays] >gi|219886721|gb|ACL53735.1| unknown [Zea mays]	Cosio_1_196.1	target	390-490	GTGCTTGGCGAGAATTGGTGTGGCCTGAGTTGGATAAATTGCTTCACGATGAGGATGCTGCTTCAAGTGTTTCTACACCATATACTGCTGCTATTCCCGA	81	80		Locus_32133	348028;248028	Cosio_1_196.1:390
Locus_32444_Transcript_2/2	gi|359482570|ref|XP_002278313.2|PREDICTED: ABC transporter G family member 29-like [Vitis vinifera]	Cosio_1_159.1	target	267-367	ACAACTCTCCTCCGCGCCCTTTCGGGGAAATTGGACGAGGACCTCAAGGTTCAAGGAGAGATCACCTACAACGGACACAAGCTCAACGAGTTCATCCCGC	85	85		Locus_32444	348095;248095	Cosio_1_159.1:267
Locus_3333_Transcript_1/1	gi|449440616|ref|XP_004138080.1|PREDICTED: E3 ubiquitin-protein ligase RGLG2-like [Cucumis sativus] >gi|449525732|ref|XP_004169870.1| PREDICTED: E3 ubiquitin-protein ligase RGLG2-like [Cucumis sativus]	Cosio_1_037.1	target	77-177	AGCCATTGTCCAAGCCAGCCACTATCCACTATCAATTGTTTTGGTTGGAGTCGGGGATGGCCCTTGGGACACGATGAAGGAGTTTGATGATAACATCCCG	79	86		Locus_3333	348133;248133	Cosio_1_037.1:77
Locus_33525_Transcript_1/1	gi|255563560|ref|XP_002522782.1|Paramyosin, putative [Ricinus communis] >gi|223538020|gb|EEF39633.1| Paramyosin, putative [Ricinus communis]	Cosio_1_070.1	target	50-150	CTGTTGCCAATGTGACAACAGAGTTGGGGGGTGCAAAGGGAGTTCTCCAAAAGTTTGTGGAGGAGGAGTCTACCCTAAGAAAACTGTTGGACTCACTAAA	86	84		Locus_33525	348046;248046	Cosio_1_070.1:50
Locus_33662_Transcript_1/1	gi|217074908|gb|ACJ85814.1|unknown [Medicago truncatula]	Cosio_1_225.1	target	10-110	GCTTGGTTAGAGGTTTCTGAAGTGAAAGGTGACGATGTAGTCTGTATAATAAAAAATAGTGCCACTCTGACTGGGTCTTTGTTCACTTTGCATGCTTCTC	77	77		Locus_33662	348072;248072	Cosio_1_225.1:10
Locus_34187_Transcript_1/1	gi|462413809|gb|EMJ18858.1|hypothetical protein PRUPE_ppa000237mg [Prunus persica]	Cosio_1_182.1	target	144-244	ACTCCTGCAGCCGCCACCTGAGACCTTCAACCTCTTCGACGACATCATCCTCCTGTCTGAGGGTCAGATTGTGTACCAGGGCCCTCGTGAGAACATTCTA	85	85		Locus_34187	348119;248119	Cosio_1_182.1:144
Locus_34848_Transcript_1/1	gi|359473803|ref|XP_002262895.2|PREDICTED: uncharacterized protein L728-like isoform 1 [Vitis vinifera]	Cosio_1_148.1	target	35-135	AGGGACATCCATTACATTCGAAATCAAGAACGCTCGGGTCAAAGCCCAAAACCTTGTCTTTCAGTCGAAAACAGCAAGCTCCGCGTACTCCTTCCCGGCA	83	82		Locus_34848	348014;248014	Cosio_1_148.1:35
Locus_34919_Transcript_1/2	gi|482575850|gb|EOA40037.1|hypothetical protein CARUB_v10008729mg, partial [Capsella rubella]	Cosio_1_147.1	target	415-515	GTCACTCTTTTTTTCAACGGAAAATGAGTAGCATGAGGGGCAAAGCTGCTTCGTCGGCCATATCATCTTAGGGAATTTCGGGTCACCAGATCTAGAATCT	80	79		Locus_34919	348013;248013	Cosio_1_147.1:415
Locus_353_Transcript_5/7	gi|404474470|ref|YP_006665838.1|hypothetical chloroplast RF19 (chloroplast) [Elodea canadensis] >gi|374094655|gb|AEY84711.1| hypothetical chloroplast RF19 (chloroplast) [Elodea canadensis]	Cosio_1_049.1	target	220-320	GGAGATATCAGCAACAACAGGTTTTATTACGGGACAGCTCATGATGTTCATATCGATCTATTATCCGCCTCTGCATCTAGCATTGGGTAGACCTCATACA	79	79		Locus_353	347992;247992	Cosio_1_049.1:220
Locus_35333_Transcript_1/1	gi|225427356|ref|XP_002282657.1|PREDICTED: lon protease homolog 2, peroxisomal [Vitis vinifera] >gi|297742183|emb|CBI33970.3| unnamed protein product [Vitis vinifera]	Cosio_1_139.1	target	20-120	AATTGGTGTGCTCCCTGTACTTGATGCTGCTGGCGACAATGCAATTGTTGGTTCTATGCTGTCAACAGGAAATGATTCTGGGGATCGAAGCTCAAAAGGC	82	84		Locus_35333	348011;248011	Cosio_1_139.1:20
Locus_35422_Transcript_5/6	gi|224124692|ref|XP_002319397.1|predicted protein [Populus trichocarpa] >gi|222857773|gb|EEE95320.1| predicted protein [Populus trichocarpa]	Cosio_1_189.1	target	54-154	GGAAGCTCGGAGGACAGGCCCTCGTCGAGGAGCTCTGCAACGGTTTCCGCCTGCTCATGGATCCCAAGCTGGGCTTGATCACGCTCGAGAGCCTTCGGAA	84	85		Locus_35422	348098;248098	Cosio_1_189.1:54
Locus_37271_Transcript_1/1	gi|5257560|gb|AAD41409.1|AF159562_1cytosolic class II low molecular weight heat shock protein [Prunus dulcis]	Cosio_1_215.1	target	200-300	TGAACTTCTTCAGCTCAGGTCGTGGCATCTTCTTCACAGTGACAGTAAGCACGCCGTCCTTGCTCGCCGCTGATATCCCTTCCATGTTAGCATCCTCCGG	81	83		Locus_37271	348035;248035	Cosio_1_215.1:200
Locus_3732_Transcript_1/1	no hit	Cosio_1_019.1	target	8-108	GCGGCAACGAGAAGAAGAAGATCTTGAGGAAATTATGGTCGCCCGGAAGATACGGAGTACGCACTACCAGAACATGCTGGACGCCCAATTGGCTTTTAGT	85	85		Locus_3732	348109;248109	Cosio_1_019.1:8
Locus_37624_Transcript_1/1	gi|413936229|gb|AFW70780.1|putative citrate synthase family protein [Zea mays]	Cosio_1_133.1	target	225-325	ATGGTGGGAACCTTCGTTGGTTGACCCAGATGAGGGTATTCGTTTTAGAGGCCTTTCTATTCCTGAATGCCAGAAAGTTCTTCCTGTAGCATCCGAGGGA	79	80		Locus_37624	348009;248009	Cosio_1_133.1:225
Locus_37855_Transcript_1/1	gi|414880679|tpg|DAA57810.1|TPA: hypothetical protein ZEAMMB73_345927 [Zea mays]	Cosio_1_234.1	target	53-153	CGCCCGACGGTCGGAGATTGGGCACGGCGATTCTGGAGAACGGGAACATCTTCACCAACTCGAATTGGTACTGGATCGGGACGGGGGCGCTGCTCGGATA	85	85		Locus_37855	348121;248121	Cosio_1_234.1:53
Locus_38822_Transcript_1/1	gi|225428372|ref|XP_002283406.1|PREDICTED: probable cellulose synthase A catalytic subunit 3 [UDP-forming]-like [Vitis vinifera]	Cosio_1_016.1	target	415-515	GACAATTCCTCTGCTCACTAATGGCGAGATGGTAGATGATATCCCTCCTGAACATCATGCCCTTGTGCCATCTTATCCCGCAGGTGGTGGTAGAAGGATT	84	84		Locus_38822	347985;247985	Cosio_1_016.1:415
Locus_38993_Transcript_1/1	gi|470135722|ref|XP_004303658.1|PREDICTED: putative phospholipid-transporting ATPase 4-like [Fragaria vesca subsp. vesca]	Cosio_1_065.1	target	10-110	TATTTGAGAGACTAGCTAAAACAGGGAGAGTGTTTGAGGAGGAAACAACGAAACACCTAAATGAGTATGGTGATGCTGGTTTGCGGACATTGGCACTTGC	84	84		Locus_38993	347995;247995	Cosio_1_065.1:10
Locus_4088_Transcript_1/2	no hit	Cosio_1_021.1	target	38-138	TGGCTACGGTGGCGGACACTATTAGTTCGGTGTTAACCCTTTACACAAACCCACTCAGTAGTATCTAAATAATGTGTAAATGGTGGTAAAAAATATTTCC	82	72		Locus_4088	348167;248167	Cosio_1_021.1:38
Locus_40978_Transcript_1/1	gi|386688300|gb|AFJ21580.1|cell wall invertase [Agave tequilana]	Cosio_1_136.1	target	75-175	AGTGTGGGCGCACTCCGTCTCCAAGGATCTCATCAACTGGAAGCGCCTCCCGCCGGCCATCTACCCCACCGACTCATTCGATGTCAACGGCTGCTGGTCT	86	85		Locus_40978	348048;248048	Cosio_1_136.1:75
Locus_4099_Transcript_5/5	gi|470145446|ref|XP_004308349.1|PREDICTED: ferric reduction oxidase 2-like [Fragaria vesca subsp. vesca]	Cosio_1_084.1	target	285-385	GTCAGATACCACATATGGGTCGGGCACATCGTGATGACGCTCTTCACAGTCCATGGGTTGTGCTACATCATCTTCTGGAGATCGACGGGCAACATCTCGG	85	84		Locus_4099	347999;247999	Cosio_1_084.1:285
Locus_41245_Transcript_1/1	gi|147783115|emb|CAN64245.1|hypothetical protein VITISV_035322 [Vitis vinifera]	Cosio_1_076.1	target	220-320	AGACCGGAACTCTAACTGTTGGCAAGCCTGTTGTTGTTGCTACCAAACTACTAAAAAACATGAACCTACAAAGCTTCTATGAATTAGTTGCTGCAGCTGA	83	79		Locus_41245	348057;248057	Cosio_1_076.1:220
Locus_41465_Transcript_1/1	no hit	Cosio_1_231.1	target	30-130	TGATGACTTGTGTCAAGTATTGGGTCAAAAAGATGTGCTTACAGAGCCCATGCTGGTCTCCTCAAACCAGTATGAAGATAAGGAGTCAGATCTACATGAA	81	84		Locus_41465	348039;248039	Cosio_1_231.1:30
Locus_41902_Transcript_1/1	gi|125541265|gb|EAY87660.1|hypothetical protein OsI_09071 [Oryza sativa Indica Group]	Cosio_1_101.1	target	320-420	GCTCCTCGACAGCCCTCGTCAGCGCTACTTCCGGTTCGTGTACAACCACGACATCGTGCCGCGGGTGCCCTTCGACGACAAGAGGTTCCTCTTCAAGCAC	86	85		Locus_41902	348005;248005	Cosio_1_101.1:320
Locus_42_Transcript_2/4	no hit	Cosio_1_002.1	target	56-156	GAATCGATGCAGCAGGAGAGGTAACTGCCCACGCTACTGCGGCGTCCGTGGCTACCCCTACTACAGCTGCGTCTCCGGCTTCATGCGAAAGTGTTGACGA	87	86		Locus_42	348099;248099	Cosio_1_002.1:56
Locus_42239_Transcript_1/1	gi|449459554|ref|XP_004147511.1|PREDICTED: heat shock 70 kDa protein, mitochondrial-like [Cucumis sativus] >gi|449511372|ref|XP_004163938.1| PREDICTED: heat shock 70 kDa protein, mitochondrial-like [Cucumis sativus]	Cosio_1_054.1	target	80-180	GGGCAGCAGTACTCTCCTAGTCAAATTGGTGCATTTGTTCTCACGAAGATGAAGGAAACTGCAGAATCATATCTTGGAAAATCTATATCAAAGGCAGTTG	80	79		Locus_42239	348056;248056	Cosio_1_054.1:80
Locus_42339_Transcript_1/1	gi|62320860|dbj|BAD93824.1|splicing factor-like protein [Arabidopsis thaliana]	Cosio_1_152.1	target	0-100	CAGTACAGCTGGAGGAACTGGTCTTCCAGGTTCTGACAGGAAGCTTTATGTCGGAAATCTACACTTCAATATGACTGAAGAACACCTTCGCCAGATTTTT	85	76		Locus_42339	348089;248089	Cosio_1_152.1:0
Locus_42501_Transcript_1/1	gi|460378451|ref|XP_004234985.1|PREDICTED: luminal-binding protein 5-like [Solanum lycopersicum]	Cosio_1_175.1	target	60-160	AGGGCTCGTTCTCGCAGGATGTCTGTTTGCCTTCTCTACGGCAAAGGAGGAAGCCTCCAAATTGGGCACAGTCATTGGGATTGATCTTGGTACAACTTAC	85	81		Locus_42501	348019;248019	Cosio_1_175.1:60
Locus_42859_Transcript_1/1	gi|238014854|gb|ACR38462.1|unknown [Zea mays]	Cosio_1_208.1	target	2-102	GATGGTGAGCATAGCCAATGATGAATGCACCAAAATAAAAGTTGAACAACTTGCATCCACTCTAGCTATTTCTGCAAGTGCAACTGCACTTGCAGTTATG	80	82		Locus_42859	348150;248150	Cosio_1_208.1:2
Locus_4297_Transcript_2/7	gi|359806392|ref|NP_001241493.1|uncharacterized protein LOC100792292 [Glycine max] >gi|255637998|gb|ACU19315.1| unknown [Glycine max]	Cosio_1_217.1	target	225-325	GAGCACAGGTGGTTAGAGTATTGCAGCAAATGCTACATGACAAGACATTTGAAGGCTATGATAACACGTCTGAGGACTGGGTATTGAGCCTCACTTCATT	82	84		Locus_4297	348036;248036	Cosio_1_217.1:225
Locus_43677_Transcript_1/1	gi|218189340|gb|EEC71767.1|hypothetical protein OsI_04375 [Oryza sativa Indica Group]	Cosio_1_122.1	target	9-109	ATTTACAAGGCCACTTCTCAGATCTCTCTCTCTCGCGCCTCCCTCTCGGATTTCTAGGGTTTCGTCCAAGTTTATTCGATCCGCCTCAGATCTAATGGCC	83	75		Locus_43677	348102;248102	Cosio_1_122.1:9
Locus_43799_Transcript_1/1	gi|406870037|gb|AFS65092.1|DnaK-type molecular chaperone hsp70, partial [Elaeis guineensis]	Cosio_1_011.1	target	59-159	GAGAACTACGCCTACAACATGAGGAACACGATCAGGGACGAGAAGATCGGCAGCAACCTCCCCGCGGCGGACAGGAAGAAGATCGAGGAGGCGGTGGAGG	88	89		Locus_43799	348141;248141	Cosio_1_011.1:59
Locus_44211_Transcript_1/1	no hit	Cosio_1_080.1	target	30-130	GGAACGATGGCTCTATATTTGATGCATGTCAAGACTTTGTGGAGTCAGGACCAGTGCCTTCAGTAGCAGAGCAAAGGTTTGAAGACACTCATATTGGCCT	80	84		Locus_44211	348114;248114	Cosio_1_080.1:30
Locus_44310_Transcript_1/1	gi|1430887|emb|CAA67588.1|70 kD heatshockprotein [Medicago sativa]	Cosio_1_009.1	target	46-146	TCCTCGATCTTCCTCTTGTCCTCCGCCGCCAGCTTCCCAGCTATCTTCTCATCCTTCACGGTGTTCCTCATATTGTACGAGTAGTTCTCCAGCGCGTTCT	82	75		Locus_44310	348074;248074	Cosio_1_009.1:46
Locus_44393_Transcript_1/1	gi|462423581|gb|EMJ27844.1|hypothetical protein PRUPE_ppa022051mg [Prunus persica]	Cosio_1_232.1	target	165-265	AAGTTGAGCATCCCGCTTCCAAGGAGAAACATATCTATAGCTTCGATGATTAGATGCATAACATCTCCCTGATCCAGATGGTGTGACATCGTACGGAAGT	80	84		Locus_44393	348040;248040	Cosio_1_232.1:165
Locus_4585_Transcript_1/4	gi|225446759|ref|XP_002282932.1|PREDICTED: protein TRANSPARENT TESTA 12 [Vitis vinifera] >gi|302143501|emb|CBI22062.3| unnamed protein product [Vitis vinifera]	Cosio_1_128.1	target	205-305	TCGGCTCTTCTCCCCAACCCCGAGATAGCCCTAGATTCCATCTCCATCTGCTCAAATTATTTGCTGTGGGACTCGACCTTCATGTTTGGTCTCGGAGGTG	85	77		Locus_4585	348047;248047	Cosio_1_128.1:205
Locus_4631_Transcript_1/2	gi|62321782|dbj|BAD95407.1|galactosidase [Arabidopsis thaliana]	Cosio_1_171.1	target	35-135	AAAGATGGTATCACGTTCCTCGATCATGGCTGAAGCCGGTCGGTAATATGTTGGTAATATTCGAAGAGTGGGGTGGAGATGTCAGTGGAATCTCTTTGGT	81	80		Locus_4631	348018;248018	Cosio_1_171.1:35
Locus_4850_Transcript_1/1	gi|224056118|ref|XP_002298730.1|predicted protein [Populus trichocarpa] >gi|222845988|gb|EEE83535.1| predicted protein [Populus trichocarpa]	Cosio_1_042.1	target	406-506	AGAACAAAGCTCTCCTCAGTATGACCAAAAAGAATGATTGATATGCCCTACGTATATGTATAAAGACACTCTGTTGATGGGCCCAAATCCAGTGTTGCAC	82	80		Locus_4850	348111;248111	Cosio_1_042.1:406
Locus_4886_Transcript_1/2	gi|404474459|ref|YP_006665827.1|NADH-plastoquinone oxidoreductase subunit 5 (chloroplast) [Elodea canadensis] >gi|374094644|gb|AEY84700.1| NADH-plastoquinone oxidoreductase subunit 5 (chloroplast) [Elodea canadensis]	Cosio_1_132.1	target	140-240	AGAGGAGCCCGGAAAAAAAGCGGGAACGAAGAAAAAGAATTGAAATGCGACAACATCTAGAGCCAAAATAAAATCCTCGGAGTCCATACTACAGATGAAT	85	81		Locus_4886	348065;248065	Cosio_1_132.1:140
Locus_4901_Transcript_2/4	gi|147818793|emb|CAN67281.1|hypothetical protein VITISV_021593 [Vitis vinifera]	Cosio_1_191.1	target	365-465	ATGATATTCTTCAGCGCACACGGAGTACCGGTTAGTTATGTTGAGGATGCAGGAGACCCTTACAGAGACCAGATGGAAGACTGCATTTCCTTGATTATGA	79	84		Locus_4901	348186;248186	Cosio_1_191.1:365
Locus_4911_Transcript_1/1	gi|255536803|ref|XP_002509468.1|kinase, putative [Ricinus communis] >gi|223549367|gb|EEF50855.1| kinase, putative [Ricinus communis]	Cosio_1_024.1	target	187-287	GCTCAGGGGGTGGTGCAAAAGTGGCGGTGACTTCTTCCTCGTCTACGACTACATGGAGAACGGGAGCCTCGACAAGAGGTTGTTCCACTGCGACCCGTTG	85	86		Locus_4911	348075;248075	Cosio_1_024.1:187
Locus_5137_Transcript_1/2	gi|356575680|ref|XP_003555966.1|PREDICTED: methylthioribose kinase 1-like [Glycine max]	Cosio_1_113.1	target	527-627	TCATGAGGACCACAGTTCAGTTGGCATACCCTTGCCCTAATCTTGATGTTAAGATCGAAGCACATGATGAGTTGATACTGCCTTCTATCTTCGGATGAAT	80	79		Locus_5137	348158;248158	Cosio_1_113.1:527
Locus_5137_Transcript_2/2	gi|356575680|ref|XP_003555966.1|PREDICTED: methylthioribose kinase 1-like [Glycine max]	Cosio_1_023.1	target	649-749	AGGGGATTCCTTCTTATGAGCGATAAAACCTCGGGAGCCTGTGTGTGATTCACCACTACCCACTTCTCGAGTTCAGGTTACAACTCGTCTCACTGCCTCT	83	83		Locus_5137	348163;248163	Cosio_1_023.1:649
Locus_516_Transcript_4/6	gi|339275441|dbj|BAK51923.1|putative high affinity nitrate transporter [Egeria densa] >gi|339275443|dbj|BAK51924.1| putative high affinity nitrate transporter [Egeria densa]	Cosio_1_165.1	target	95-195	CGCGGCAATTCTCGGCATACTTGAGGCTGGCGAGATGGTACCCTTTCTTCTGCTCCTCTTCGGTCCACTCGGAGAGGTAGTAGCTCTCCTCTGAAGCGTC	83	85		Locus_516	348017;248017	Cosio_1_165.1:95
Locus_6116_Transcript_1/1	gi|356575759|ref|XP_003556004.1|PREDICTED: cysteine-rich receptor-like protein kinase 29-like isoform 1 [Glycine max]	Cosio_1_099.1	target	260-360	CGAACGCGCTCATCGACTGCGCGAATAAAAAGTTCGCCGTGGGTTCGTTCGACGGTTGCAGTTTATCGTGGAGAAATAGGAACTATAGCGACATACTGTT	80	79		Locus_6116	348004;248004	Cosio_1_099.1:260
Locus_613_Transcript_1/6	no hit	Cosio_1_083.1	target	627-727	AGTAATCCCAAATACGACAGCTGCAGCAGTACATTTTTTGGCCGTTGGATCGGAATCCGACGGCCATGCTTGGCAACCCTTGCAGCTTTGCTGTGATCCA	79	85		Locus_613	348165;248165	Cosio_1_083.1:627
Locus_613_Transcript_6/6	no hit	Cosio_1_018.1	target	341-441	TGCGTGGACCTGCACGGACGCACATCTATCTCGTATCCTATTCCTATAATACGTCTCGCTCCATGTATCTACCGTATCATATGTTTCAAGCCCCTCGTCT	82	77		Locus_613	348171;248171	Cosio_1_018.1:341
Locus_6405_Transcript_1/2	gi|224076570|ref|XP_002304963.1|predicted protein [Populus trichocarpa] >gi|222847927|gb|EEE85474.1| predicted protein [Populus trichocarpa]	Cosio_1_046.1	target	285-385	CTTCTGTGGTGTTCATGTTAGAGAATGAAACACCAATTACTCCGGAGCCTGAGAAGCCGCATTTTACAGGTTGGGCATACCAAGATGATAGCACACGATA	79	83		Locus_6405	348055;248055	Cosio_1_046.1:285
Locus_651_Transcript_5/8	gi|462421955|gb|EMJ26218.1|hypothetical protein PRUPE_ppa020099mg [Prunus persica]	Cosio_1_053.1	target	70-170	CGGAGGCGCTCCAGCTGAAGCTCATCGCCATCGCCTCCATCCTCATCGCGAGCACGTTAGGCGTCAGCCTGCCGCTGTTCTCGCGGTCCCTCCCGATGCT	85	85		Locus_651	348189;248189	Cosio_1_053.1:70
Locus_6512_Transcript_1/3	gi|76559894|tpe|CAI56334.1|TPA: isoflavone reductase-like protein 5 [Vitis vinifera]	Cosio_1_004.1	target	338-438	TCGGCCAGGAATTTCTGATGTGTATGGCTAACGTGTCCTTTTAACATCCCGGACTTATGTTACTGTCACTATTAATCTATCCGACTCAAACTCGAATGGA	78	76		Locus_6512	348170;248170	Cosio_1_004.1:338
Locus_6516_Transcript_1/1	gi|255540795|ref|XP_002511462.1|conserved hypothetical protein [Ricinus communis] >gi|223550577|gb|EEF52064.1| conserved hypothetical protein [Ricinus communis]	Cosio_1_088.1	target	110-210	CCATACGACACGGTATTGATCAGCTAATGCAATCCACGAAAACAAAAGAATGAAAACTAGCGAAAGAAATCGAGAAGAGAAGGGAATATATGATCTAATG	81	82		Locus_6516	348058;248058	Cosio_1_088.1:110
Locus_662_Transcript_1/1	no hit	Cosio_1_134.1	target	106-206	ATCAAATCTATTACTTATGTCAATGATCCCATATAGTAAATGAATGGAATATCATGAAAATAGAGCCACTTTAAGCTTCCCTAGGAAATGTTGTGTTCGA	71	76		Locus_662	348129;248129	Cosio_1_134.1:106
Locus_7056_Transcript_1/3	no hit	Cosio_1_063.1	target	21-121	GTTTCCGCATCCTCCACTATAACCGCCACCACATCCTTCCCTTTCTCCCCCGCCGGTCACCGCCAAGGAGAAGAGGCTCGCAGCTCCGCTCCGGCTCCGG	81	90		Locus_7056	348147;248147	Cosio_1_063.1:21
Locus_7097_Transcript_1/1	gi|125535351|gb|EAY81899.1|hypothetical protein OsI_37065 [Oryza sativa Indica Group]	Cosio_1_198.1	target	87-187	CGTTTTTGATGCTAAGAGGTTGATCGGGAGGAGGGTAACCGATGCATCTGTTCAGAGCGATATCAAGTTATGGCCTTTCAAGATCACATCCGGCCCTGGT	81	81		Locus_7097	348146;248146	Cosio_1_198.1:87
Locus_717_Transcript_2/3	no hit	Cosio_1_052.1	target	89-189	GAGACGATAGTGCAAGGAAGCACTAACTCTCATGTATACGAATTCATACATGGACGTGATGTCGAAGTCACACGAACATTGTTAGACATTCATCATCGTC	81	77		Locus_717	348191;248191	Cosio_1_052.1:89
Locus_732_Transcript_1/2	gi|5453379|gb|AAD43561.1|AF155124_1bacterial-induced peroxidase precursor [Gossypium hirsutum]	Cosio_1_090.1	target	194-294	GCAGATCAGGCTGAACTGCAGGGTCCCCAACTAGGGTTCCAGTGGAATAGGGGGAAATCTTACAATAATAATTTACGGAGATTACTACATAAATGTACCG	86	74		Locus_732	348101;248101	Cosio_1_090.1:194
Locus_7500_Transcript_1/1	gi|359491817|ref|XP_002270758.2|PREDICTED: uncharacterized protein At4g15970-like [Vitis vinifera]	Cosio_1_211.1	target	390-490	TGCAGTTCTACAGGTTCTGGTACGCGTCCAGGTTGAACTATACGGGGAAGCACGACCAGGATGTCCTCAACGAGATCAAGTTCCATCCTTTCATCACCAA	84	80		Locus_7500	348033;248033	Cosio_1_211.1:390
Locus_772_Transcript_7/9	gi|356571700|ref|XP_003554012.1|PREDICTED: LOW QUALITY PROTEIN: zinc finger AN1 domain-containing stress-associated protein 12-like [Glycine max]	Cosio_1_107.1	target	656-756	TGAGACTCTCGAGTGCTTCTGTTCATCAGCTTTGTAACACAGCAGAATTGTCCCAAACTACCATACCAATTAAAAGAGTTGCCAAAACAGATCGAAAGAT	78	80		Locus_772	348177;248177	Cosio_1_107.1:656
Locus_780_Transcript_3/3	no hit	Cosio_1_212.1	target	109-209	CACCCTTAAGTTAAACACTTGTAGTTTACGTGCTATGCTGCTATGGTTGTTATGTATGGACTTACTGTAAACCTTATTCCCCAATGTACTATCTAAATAA	75	73		Locus_780	348123;248123	Cosio_1_212.1:109
Locus_7843_Transcript_4/8	gi|414869596|tpg|DAA48153.1|TPA: hypothetical protein ZEAMMB73_593378 [Zea mays]	Cosio_1_202.1	target	156-256	TGGCCAAGCTTGAACTTGAACGGCGAGTCACGATCCCTGCTCGAGTCGAACTTGGTGCCGTCGAGTAGCGTACCCGTGTAGTGAACTTCGACCTCGTCGC	84	83		Locus_7843	348164;248164	Cosio_1_202.1:156
Locus_7928_Transcript_2/2	no hit	Cosio_1_089.1	target	30-130	TATCTGCACACACCTCAAACATTTCATTGCACAGGCAGCCACAAATAGTACAAAGGATGGGATCTCCCAGGAAATTTTACAGGAGAGATCTCAGTTGCCG	82	83		Locus_7928	348059;248059	Cosio_1_089.1:30
Locus_795_Transcript_3/4	no hit	Cosio_1_058.1	target	19-119	GATCGACAACCATGGCCACCGGTTCTAAGACCGCCACCCTAGTCCTTCTCCTCCTCGCTCTGATTGTGATGTCGTGCATTCAATCGGCACACGCATCGGA	85	81		Locus_795	348173;248173	Cosio_1_058.1:19
Locus_805_Transcript_5/7	no hit	Cosio_1_082.1	target	36-136	AGGAGGCGGAGCGCGGTGCGTCGTGGGTGGAGCAGATGGCGGAGACTGGGAGGCAGGTGGAGTTGGTGCGGCTGATGCTGGAGATGAAGCAGCTGGAGCT	90	89		Locus_805	348166;248166	Cosio_1_082.1:36
Locus_8585_Transcript_1/1	no hit	Cosio_1_106.1	target	0-100	GAAAGATAGAATGCTACCATCAAGATCCATAAATAATGCAATTTCTCTACAAATGGACATACAACTCCTACTTTATTGTGGAGGAAAAAGATCCAATGTT	76	77		Locus_8585	348081;248081	Cosio_1_106.1:0
Locus_8873_Transcript_1/2	gi|356556634|ref|XP_003546628.1|PREDICTED: probable rhamnose biosynthetic enzyme 1-like [Glycine max]	Cosio_1_228.1	target	1390-1490	ATAGGGATTGCGAGTATACCATTCCAGTGTCTTCCTGAGGCCATCTTCCCATGAGGTACGCTCTGCCCAACCAAGCCTTTTCAGTTTCTCATCATCCAGA	82	80		Locus_8873	348038;248038	Cosio_1_228.1:1390
Locus_9044_Transcript_3/3	no hit	Cosio_1_025.1	target	267-367	AGAAGAATAAATCTAATATATAATGGTCATATCTAAGAAGAATGTACCTAAAACACCATCTAACAACTCTAAAAAAATCGAAATAAGTACTCAAAATGGC	73	78		Locus_9044	348104;248104	Cosio_1_025.1:267
Locus_908_Transcript_2/2	gi|242066626|ref|XP_002454602.1|hypothetical protein SORBIDRAFT_04g034160 [Sorghum bicolor] >gi|241934433|gb|EES07578.1| hypothetical protein SORBIDRAFT_04g034160 [Sorghum bicolor]	Cosio_1_102.1	target	1846-1946	GCCGTGTAAACCAGTCCCCGCACAGGATGATCTCGGTCGTTCGTCTTCCATCACACGGTTAAAAAGGATACCGCGTTGGTTGTAACAAAAAATGAATGCT	83	79		Locus_908	348176;248176	Cosio_1_102.1:1846
Locus_9183_Transcript_1/6	no hit	Cosio_1_197.1	target	58-158	AAGGAGAAGGAGAACCCGCCTGATCAAGAAGCGAAGCTGGCGCTCGACGAAGAACTCGACTACATCAAGGAGTTCAAGCCCAAGAGCAGGAGGATCATGG	86	84		Locus_9183	348162;248162	Cosio_1_197.1:58
Locus_9183_Transcript_2/6	gi|110681464|emb|CAL25342.1|putative zinc-binding protein [Platanus x acerifolia]	Cosio_1_151.1	target	72-172	TTCTTCGTACCCTGCGGATTCCACGCCGATTCCCACAAGAGCGAGTGCAACATGTTCTGTCTCGATTGCACCAATGGCGCGCTCTGCTCTCTCTGCCTCG	84	83		Locus_9183	348161;248161	Cosio_1_151.1:72
Locus_9208_Transcript_2/2	no hit	Cosio_1_112.1	target	13-113	GGGAATGAAGAACTCAAACCAGAAAATGGCAATCAAGAAGAAGACACCCAAAGCTAAAGCGGCCTAACTTAGGCTATGGTTAGTTCGTAAAGCAATTATT	85	77		Locus_9208	348168;248168	Cosio_1_112.1:13
Locus_967_Transcript_4/4	no hit	Cosio_1_158.1	target	62-162	CATATGTCTCTAAAACCAAACAGCCGCAGCTGTGCTGTTTTGAGCCGTCCGGATGAGATCCTACGGTCCACAAATAACACACAAAAACTCCCCTTATTGC	82	83		Locus_967	348183;248183	Cosio_1_158.1:62
Locus_9777_Transcript_1/1	no hit	Cosio_1_179.1	target	1-101	GGGGGGTCGATTTTTATTAAAAACGGGGCCACGTGTCAAGCCCTAGTTGGTCCAAATAAGCCAATCTTATTTTATTCTTATTCAATAAAATATAGGTCCA	76	73		Locus_9777	348151;248151	Cosio_1_179.1:1
Locus_13785_Transcript_1/2	no hit	Cosio_1_123.1	internal control	330-430	CTTGTATGAGCATCTGCATCTTCATCCTGTGGACCATGACCTTGACTTCTGATTTCCAATGTTGGCGGCAAGGCCTCGTCCATCTCCATTTCCTGACAAG	80	80		Locus_13785	348008;248008	Cosio_1_123.1:330
Locus_20334_Transcript_1/1	gi|15220572|ref|NP_176363.1|DNA-directed RNA polymerases II subunit L [Arabidopsis thaliana] >gi|297840381|ref|XP_002888072.1| predicted protein [Arabidopsis lyrata subsp. lyrata] >gi|11134747|sp|Q9SYA6.1|RPAB5_ARATH RecName: Full=DNA-directed RNA polymerases I, II, and III subunit RPABC5; Short=RNA polymerases I, II, and III subunit ABC5; AltName: Full=ABC10; AltName: Full=DNA-directed RNA polym…	Cosio_1_030.1	internal control	505-605	CACTCCAGAAAAAGCTCTTCCATATCTGTGGGTGTTTTAATCCATGGTATGTGGGTTGCTCGACTTTCTTTTTGATCTTGGACTTGCACTGTCTTGCAAC	76	75		Locus_20334	348076;248076	Cosio_1_030.1:505
Locus_22170_Transcript_1/1	no hit	Cosio_1_117.1	internal control	410-510	ATCCTTCTCCTGACCGAACTGATCACCCTGATCTCTGCTTCCATTCTGTGGAACGAGTTTGTAACATACATTGGATGTCGGAGGTGTGTTAATCCGGCGA	81	79		Locus_22170	348061;248061	Cosio_1_117.1:410
Locus_34909_Transcript_1/1	no hit	Cosio_1_126.1	internal control	8-108	TTTTATTGTATTAACACGTCGACAGCAACAATTGACACAAGAGCAACAGATCATCTTCCCCAAAATACCCTAAAAACGAAAACAGCAGAAGCAATACAAT	76	81		Locus_34909	348127;248127	Cosio_1_126.1:8
Locus_7539_Transcript_1/1	gi|115478893|ref|NP_001063040.1|Os09g0375900 [Oryza sativa Japonica Group] >gi|49387690|dbj|BAD26036.1| hypoxia-responsive protein / zinc finger (C3HC4-type RING finger) protein-like [Oryza sativa Japonica Group] >gi|113631273|dbj|BAF24954.1| Os09g0375900 [Oryza sativa Japonica Group] >gi|125563505|gb|EAZ08885.1| hypothetical protein OsI_31148 [Oryza sativa Indica Group] >gi|125605501|gb|EAZ44537…	Cosio_1_176.1	internal control	335-435	AGCTCAATCATCTTGACATTGGAGAGAAAGTGCTGTTTAATGTTGGCTGCAATGTGAAGCGGCTGGAGCTTATACACTCTAACATCAGTAGAGCTTTTCA	79	80		Locus_7539	348020;248020	Cosio_1_176.1:335
Locus_9475_Transcript_1/1	gi|462414484|gb|EMJ19221.1|hypothetical protein PRUPE_ppa005935mg [Prunus persica]	Cosio_1_207.1	internal control	65-165	GTCAGCGGAAGGCGTCCTATAGAGACCAAAAGGGAAATGAAGGAGCGATTAACTGCAAGATGGGCTATGAAGAAGTTCATGGATGGAAATGCTACTGAAG	86	85		Locus_9475	348032;248032	Cosio_1_207.1:65
NODE_4_length_130	no hit	Cosio_1_057.1	internal control	53-153	TCACAGCCATGTCGAGCTGCGACAACTGTAGCTGTGCTGACAAAACCAACTGCCCGAAGAAGGGAAACAGCTACGGCATCGAAATCATCCAGACCGA	87	87		Cosio_1_057	348149;248149	Cosio_1_057.1:53
NODE_47_length_123	gi|94557288|gb|AAY26520.1|secretory peroxidase [Catharanthus roseus] >gi|94959283|gb|ABF47518.1| putative secretory peroxidase [Catharanthus roseus]	Cosio_1_120.1	internal control	8-108	AGCTGACCCGGGCCTCGTGATGAACTTCTACAAGGACACATGTCCCCAGGCCGAGGACATCATCAGAGAGCAGGTGAAGCTCCTCTACAAGCGCCACAAG	85	86		Cosio_1_120	348126;248126	Cosio_1_120.1:8
